# Supplementary material for: Lived Experience as a Protective Factor for Mental Health Workers
Source: Atypon-hosted journal article supplement (doi:10.1176/appi.ps.202100468), 2022-03-16
Supplement: appi.ps.202100468.ds001.pdf [file appi.ps.202100468.ds001.pdf]

# Matrix

Run MATRIX procedure:

\*\*\*\*\* PROCESS Procedure for SPSS Version 3.5 \*\*\*\*\*

Written by Andrew F. Hayes, Ph.D.      www.afhayes.com  
Documentation available in Hayes (2018). www.guilford.com/p/hayes3

\*\*\*\*\*

Model : 7  
Y : clientim  
X : jobsat  
M : burnout  
W : Q22

Sample  
Size: 178

\*\*\*\*\*

OUTCOME VARIABLE:  
burnout

## Model Summary

|   | R     | R-sq  | MSE   | F       | df1    | df2      |       |
|---|-------|-------|-------|---------|--------|----------|-------|
| p | .4992 | .2492 | .3112 | 19.2509 | 3.0000 | 174.0000 | .0000 |

## Model

|          | coeff  | se    | t       | p     | LLCI   | ULCI   |
|----------|--------|-------|---------|-------|--------|--------|
| constant | 3.8125 | .0425 | 89.8053 | .0000 | 3.7287 | 3.8963 |
| jobsat   | .4657  | .0639 | 7.2845  | .0000 | .3395  | .5919  |
| Q22      | -.0190 | .0880 | -.2155  | .8296 | -.1926 | .1547  |
| Int_1    | .2348  | .1336 | 1.7576  | .0806 | -.0289 | .4984  |

## Product terms key:

Int\_1 : jobsat x Q22

## Test(s) of highest order unconditional interaction(s):

|     | R2-chng | F      | df1    | df2      | p     |
|-----|---------|--------|--------|----------|-------|
| X*W | .0133   | 3.0893 | 1.0000 | 174.0000 | .0806 |

-----

Focal predict: jobsat (X)  
Mod var: Q22 (W)

## Conditional effects of the focal predictor at values of the moderator(s):

|    | Q22    | Effect | se    | t      | p     | LLCI  | UL    |
|----|--------|--------|-------|--------|-------|-------|-------|
| CI | -.3764 | .3774  | .0794 | 4.7499 | .0000 | .2206 | .5342 |

40 .6236 .6121 .1074 5.7014 .0000 .4002 .82

Data for visualizing the conditional effect of the focal predictor:  
 Paste text below into a SPSS syntax window and execute to produce plot.

```
DATA LIST FREE/
  jobsat      Q22      burnout      .
BEGIN DATA.
  -.6664      -.3764      3.5682
   .0000      -.3764      3.8196
   .6664      -.3764      4.0711
  -.6664      .6236      3.3928
   .0000      .6236      3.8007
   .6664      .6236      4.2086
END DATA.
GRAPH/SCATTERPLOT=
  jobsat WITH burnout BY Q22 .
```

\*\*\*\*\*  
 OUTCOME VARIABLE:  
 clientim

Model Summary

|       | R     | R-sq  | MSE   | F       | df1    | df2      | p     |
|-------|-------|-------|-------|---------|--------|----------|-------|
| Model | .3925 | .1541 | .4690 | 15.9351 | 2.0000 | 175.0000 | .0000 |

Model

|          | coeff  | se    | t      | p     | LLCI   | ULCI   |
|----------|--------|-------|--------|-------|--------|--------|
| constant | 3.0688 | .3541 | 8.6664 | .0000 | 2.3699 | 3.7676 |
| jobsat   | .1691  | .0883 | 1.9140 | .0572 | -.0053 | .3434  |
| burnout  | .3427  | .0922 | 3.7162 | .0003 | .1607  | .5247  |

\*\*\*\*\* DIRECT AND INDIRECT EFFECTS OF X ON Y \*\*\*\*\*

Direct effect of X on Y

| Effect | se    | t      | p     | LLCI   | ULCI  |
|--------|-------|--------|-------|--------|-------|
| jobsat | .0883 | 1.9140 | .0572 | -.0053 | .3434 |

Conditional indirect effects of X on Y:

INDIRECT EFFECT:

| Q22    | Effect | BootSE | BootLLCI | BootULCI |
|--------|--------|--------|----------|----------|
| -.3764 | .1293  | .0512  | .0488    | .2496    |
| .6236  | .2098  | .0808  | .0788    | .3955    |

Index of moderated mediation (difference between conditional indirect effects):

| Index | BootSE | BootLLCI | BootULCI |
|-------|--------|----------|----------|
|       |        |          |          |

```
Q22      .0804      .0615      -.0151      .2208
---
```

```
***** ANALYSIS NOTES AND ERRORS *****
```

```
Level of confidence for all confidence intervals in output:
  95.0000
```

```
Number of bootstrap samples for percentile bootstrap confidence intervals:
  5000
```

```
NOTE: The following variables were mean centered prior to analysis:
      Q22      jobsat
```

```
WARNING: Variables names longer than eight characters can produce incorrect
output
when some variables in the data file have the same first eight characters.
Shorter
variable names are recommended. By using this output, you are accepting all
risk
and consequences of interpreting or reporting results that may be incorrect
.
```

```
----- END MATRIX -----
```

```
* Encoding: UTF-8.
```

```
/* PROCESS version 3.5 */.
/* Written by Andrew F. Hayes */.
/* www.afhayes.com*/.
/* www.processmacro.org*/.
/* Copyright 2017-2020 by Andrew F. Hayes */.
/* Documented in http://www.guilford.com/p/hayes3 */.
/* PROCESS workshop schedule at http://www.processmacro.org/workshops.html
*/.
```

```
/* THIS SOFTWARE IS PROVIDED "AS IS", WITHOUT WARRANTY OF ANY KIND */.
/* EXPRESS OR IMPLIED, INCLUDING BUT NOT LIMITED TO THE WARRANTIES OF */.
/* MERCHANTABILITY, FITNESS FOR A PARTICULAR PURPOSE AND NONINFRINGEMENT*/.
.
/* IN NO EVENT SHALL THE COPYRIGHT HOLDERS BE LIABLE FOR ANY CLAIM, */.
/* DAMAGES OR OTHER LIABILITY, WHETHER IN AN ACTION OF CONTRACT, TORT */.
/* OR OTHERWISE, ARISING FROM, OUT OF OR IN CONNECTION WITH THE */.
/* SOFTWARE OR THE USE OR OTHER DEALINGS IN THE SOFTWARE */.
/* USE OF THIS SOFTWARE IMPLIES AGREEMENT WITH THESE TERMS */.
```

```
set printback=off.
```

## Matrix

```
Run MATRIX procedure:
```

\*\*\*\*\* PROCESS Procedure for SPSS Version 3.5 \*\*\*\*\*

Written by Andrew F. Hayes, Ph.D. www.afhayes.com  
Documentation available in Hayes (2018). www.guilford.com/p/hayes3

\*\*\*\*\*

Model : 7  
Y : clientim  
X : engaged  
M : burnout  
W : Q22

Sample  
Size: 178

\*\*\*\*\*

OUTCOME VARIABLE:  
burnout

Model Summary

|   | R     | R-sq  | MSE   | F       | df1    | df2      |       |
|---|-------|-------|-------|---------|--------|----------|-------|
| p | .4379 | .1917 | .3351 | 13.7597 | 3.0000 | 174.0000 | .0000 |

Model

|          | coeff  | se    | t       | p     | LLCI   | ULCI   |
|----------|--------|-------|---------|-------|--------|--------|
| constant | 3.8191 | .0441 | 86.5661 | .0000 | 3.7320 | 3.9062 |
| engaged  | .4136  | .0739 | 5.5952  | .0000 | .2677  | .5595  |
| Q22      | -.0272 | .0914 | -.2980  | .7661 | -.2077 | .1532  |
| Int_1    | .3663  | .1505 | 2.4336  | .0160 | .0692  | .6634  |

Product terms key:

Int\_1 : engaged x Q22

Test(s) of highest order unconditional interaction(s):

|     | R2-chng | F      | df1    | df2      | p     |
|-----|---------|--------|--------|----------|-------|
| X*W | .0275   | 5.9222 | 1.0000 | 174.0000 | .0160 |

-----

Focal predict: engaged (X)  
Mod var: Q22 (W)

Conditional effects of the focal predictor at values of the moderator(s):

|    | Q22    | Effect | se    | t      | p     | LLCI  | UL  |
|----|--------|--------|-------|--------|-------|-------|-----|
| CI |        |        |       |        |       |       |     |
| 42 | -.3764 | .2757  | .0955 | 2.8872 | .0044 | .0872 | .46 |
| 16 | .6236  | .6420  | .1163 | 5.5181 | .0000 | .4124 | .87 |

Data for visualizing the conditional effect of the focal predictor:  
Paste text below into a SPSS syntax window and execute to produce plot.

```

DATA LIST FREE/
  engaged Q22 burnout .
BEGIN DATA.
  -.5996 -.3764 3.6640
  .0000 -.3764 3.8293
  .5996 -.3764 3.9947
  -.5996 .6236 3.4172
  .0000 .6236 3.8021
  .5996 .6236 4.1871
END DATA.
GRAPH/SCATTERPLOT=
  engaged WITH burnout BY Q22 .

*****
OUTCOME VARIABLE:
  clientim

Model Summary
      R      R-sq      MSE      F      df1      df2
p
.5191 .2694 .4051 32.2705 2.0000 175.0000 .00
00

Model
      coeff      se      t      p      LLCI      ULCI
constant 3.4532 .3149 10.9669 .0000 2.8317 4.0746
engaged .4924 .0872 5.6462 .0000 .3203 .6645
burnout .2415 .0819 2.9482 .0036 .0798 .4032

***** DIRECT AND INDIRECT EFFECTS OF X ON Y *****

Direct effect of X on Y
      Effect      se      t      p      LLCI      ULCI
.4924 .0872 5.6462 .0000 .3203 .6645

Conditional indirect effects of X on Y:

INDIRECT EFFECT:
engaged -> burnout -> clientim

      Q22      Effect      BootSE      BootLLCI      BootULCI
-.3764 .0666 .0329 .0138 .1406
.6236 .1550 .0713 .0314 .3090

Index of moderated mediation (difference between conditional indirect effects):
      Index      BootSE      BootLLCI      BootULCI
Q22 .0885 .0568 .0019 .2191
---
```

\*\*\*\*\* ANALYSIS NOTES AND ERRORS \*\*\*\*\*

Level of confidence for all confidence intervals in output:  
95.0000

Number of bootstrap samples for percentile bootstrap confidence intervals:  
5000

NOTE: The following variables were mean centered prior to analysis:  
Q22 engaged

WARNING: Variables names longer than eight characters can produce incorrect output when some variables in the data file have the same first eight characters. Shorter variable names are recommended. By using this output, you are accepting all risk and consequences of interpreting or reporting results that may be incorrect.

----- END MATRIX -----

\* Encoding: UTF-8.

/\* PROCESS version 3.5 \*/.  
/\* Written by Andrew F. Hayes \*/.  
/\* www.afhayes.com\*/.  
/\* www.processmacro.org\*/.  
/\* Copyright 2017-2020 by Andrew F. Hayes \*/.  
/\* Documented in <http://www.guilford.com/p/hayes3> \*/.  
/\* PROCESS workshop schedule at <http://www.processmacro.org/workshops.html> \*/.  
\*/.

/\* THIS SOFTWARE IS PROVIDED "AS IS", WITHOUT WARRANTY OF ANY KIND \*/.  
/\* EXPRESS OR IMPLIED, INCLUDING BUT NOT LIMITED TO THE WARRANTIES OF \*/.  
/\* MERCHANTABILITY, FITNESS FOR A PARTICULAR PURPOSE AND NONINFRINGEMENT \*/.

/\* IN NO EVENT SHALL THE COPYRIGHT HOLDERS BE LIABLE FOR ANY CLAIM, \*/.  
/\* DAMAGES OR OTHER LIABILITY, WHETHER IN AN ACTION OF CONTRACT, TORT \*/.  
/\* OR OTHERWISE, ARISING FROM, OUT OF OR IN CONNECTION WITH THE \*/.  
/\* SOFTWARE OR THE USE OR OTHER DEALINGS IN THE SOFTWARE \*/.  
/\* USE OF THIS SOFTWARE IMPLIES AGREEMENT WITH THESE TERMS \*/.

set printback=off.

## Matrix

Run MATRIX procedure:

\*\*\*\*\* PROCESS Procedure for SPSS Version 3.5 \*\*\*\*\*

Written by Andrew F. Hayes, Ph.D. [www.afhayes.com](http://www.afhayes.com)  
Documentation available in Hayes (2018). [www.guilford.com/p/hayes3](http://www.guilford.com/p/hayes3)

```

*****
Model   : 7
Y       : clientim
X       : wellbein
M       : burnout
W       : Q22

```

```

Sample
Size: 178

```

```

*****
OUTCOME VARIABLE:
burnout

```

```

Model Summary

```

|       | R     | R-sq  | MSE   | F       | df1    | df2      | p     |
|-------|-------|-------|-------|---------|--------|----------|-------|
| Model | .4075 | .1660 | .3457 | 11.5484 | 3.0000 | 174.0000 | .0000 |

```

Model

```

|          | coeff  | se    | t       | p     | LLCI   | ULCI   |
|----------|--------|-------|---------|-------|--------|--------|
| constant | 3.7923 | .0451 | 84.1737 | .0000 | 3.7034 | 3.8813 |
| wellbein | .2796  | .0497 | 5.6248  | .0000 | .1815  | .3777  |
| Q22      | -.0403 | .0935 | -.4315  | .6667 | -.2249 | .1442  |
| Int_1    | -.0798 | .1025 | -.7784  | .4374 | -.2822 | .1226  |

```

Product terms key:
Int_1   :      wellbein x      Q22

```

```

Test(s) of highest order unconditional interaction(s):

```

|     | R2-chng | F     | df1    | df2      | p     |
|-----|---------|-------|--------|----------|-------|
| X*W | .0029   | .6059 | 1.0000 | 174.0000 | .4374 |

```

-----
Focal predict: wellbein (X)
Mod var: Q22 (W)

```

```

Data for visualizing the conditional effect of the focal predictor:
Paste text below into a SPSS syntax window and execute to produce plot.

```

```

DATA LIST FREE/
wellbein Q22 burnout .
BEGIN DATA.
-.9090 -.3764 3.5261
.0000 -.3764 3.8075
.9090 -.3764 4.0890
-.9090 .6236 3.5583
.0000 .6236 3.7672
.9090 .6236 3.9761
END DATA.
GRAPH/SCATTERPLOT=
wellbein WITH burnout BY Q22 .

```

\*\*\*\*\*  
 OUTCOME VARIABLE:  
 clientim

Model Summary

|   | R     | R-sq  | MSE   | F       | df1    | df2      |       |
|---|-------|-------|-------|---------|--------|----------|-------|
| p | .3879 | .1505 | .4710 | 15.4982 | 2.0000 | 175.0000 | .0000 |

Model

|          | coeff  | se    | t      | p     | LLCI   | ULCI   |
|----------|--------|-------|--------|-------|--------|--------|
| constant | 2.9742 | .3394 | 8.7622 | .0000 | 2.3043 | 3.6442 |
| wellbein | .1058  | .0620 | 1.7055 | .0899 | -.0166 | .2282  |
| burnout  | .3675  | .0883 | 4.1623 | .0000 | .1933  | .5418  |

\*\*\*\*\* DIRECT AND INDIRECT EFFECTS OF X ON Y \*\*\*\*\*

Direct effect of X on Y

| Effect | se    | t      | p     | LLCI   | ULCI  |
|--------|-------|--------|-------|--------|-------|
| .1058  | .0620 | 1.7055 | .0899 | -.0166 | .2282 |

Conditional indirect effects of X on Y:

INDIRECT EFFECT:

wellbein -> burnout -> clientim

| Q22    | Effect | BootSE | BootLLCI | BootULCI |
|--------|--------|--------|----------|----------|
| -.3764 | .1138  | .0393  | .0473    | .2014    |
| .6236  | .0845  | .0557  | -.0014   | .2207    |

Index of moderated mediation (difference between conditional indirect effects):

| Q22 | Index  | BootSE | BootLLCI | BootULCI |
|-----|--------|--------|----------|----------|
| --- | -.0293 | .0603  | -.1457   | .0955    |

\*\*\*\*\* ANALYSIS NOTES AND ERRORS \*\*\*\*\*

Level of confidence for all confidence intervals in output:  
 95.0000

Number of bootstrap samples for percentile bootstrap confidence intervals:  
 5000

NOTE: The following variables were mean centered prior to analysis:  
 Q22 wellbein

WARNING: Variables names longer than eight characters can produce incorrect output when some variables in the data file have the same first eight characters. Shorter

variable names are recommended. By using this output, you are accepting all risk and consequences of interpreting or reporting results that may be incorrect .

----- END MATRIX -----

\* Encoding: UTF-8.

/\* PROCESS version 3.5 \*/.  
/\* Written by Andrew F. Hayes \*/.  
/\* www.afhayes.com\*/.  
/\* www.processmacro.org\*/.  
/\* Copyright 2017-2020 by Andrew F. Hayes \*/.  
/\* Documented in <http://www.guilford.com/p/hayes3> \*/.  
/\* PROCESS workshop schedule at <http://www.processmacro.org/workshops.html> \*/.  
\*/.

/\* THIS SOFTWARE IS PROVIDED "AS IS", WITHOUT WARRANTY OF ANY KIND \*/.  
/\* EXPRESS OR IMPLIED, INCLUDING BUT NOT LIMITED TO THE WARRANTIES OF \*/.  
/\* MERCHANTABILITY FITNESS FOR A PARTICULAR PURPOSE AND NONINFRINGEMENT \*/.

/\* IN NO EVENT SHALL THE COPYRIGHT HOLDERS BE LIABLE FOR ANY CLAIM, \*/.  
/\* DAMAGES OR OTHER LIABILITY, WHETHER IN AN ACTION OF CONTRACT, TORT \*/.  
/\* OR OTHERWISE, ARISING FROM, OUT OF OR IN CONNECTION WITH THE \*/.  
/\* SOFTWARE OR THE USE OR OTHER DEALINGS IN THE SOFTWARE \*/.  
/\* USE OF THIS SOFTWARE IMPLIES AGREEMENT WITH THESE TERMS \*/.

set printback=off.

## Matrix

Run MATRIX procedure:

\*\*\*\*\* PROCESS Procedure for SPSS Version 3.5 \*\*\*\*\*

Written by Andrew F. Hayes, Ph.D.      [www.afhayes.com](http://www.afhayes.com)  
Documentation available in Hayes (2018). [www.guilford.com/p/hayes3](http://www.guilford.com/p/hayes3)

\*\*\*\*\*

Model : 7  
Y : clientim  
X : intquitF  
M : burnout  
W : Q22

Sample  
Size: 178

\*\*\*\*\*

OUTCOME VARIABLE:  
burnout

Model Summary

|   | R     | R-sq  | MSE   | F      | df1    | df2      |       |
|---|-------|-------|-------|--------|--------|----------|-------|
| p | .2745 | .0753 | .3833 | 4.7252 | 3.0000 | 174.0000 | .0034 |

Model

|          | coeff  | se    | t       | p     | LLCI   | ULCI   |
|----------|--------|-------|---------|-------|--------|--------|
| constant | 3.7948 | .0469 | 80.9049 | .0000 | 3.7022 | 3.8874 |
| intquitF | -.1380 | .0404 | -3.4167 | .0008 | -.2178 | -.0583 |
| Q22      | -.0979 | .0971 | -1.0084 | .3147 | -.2894 | .0937  |
| Int_1    | .0584  | .0825 | .7074   | .4803 | -.1045 | .2213  |

Product terms key:

Int\_1 : intquitF x Q22

Test(s) of highest order unconditional interaction(s):

|     | R2-chng | F     | df1    | df2      | p     |
|-----|---------|-------|--------|----------|-------|
| X*W | .0027   | .5004 | 1.0000 | 174.0000 | .4803 |

-----

Focal predict: intquitF (X)  
Mod var: Q22 (W)

Data for visualizing the conditional effect of the focal predictor:  
Paste text below into a SPSS syntax window and execute to produce plot.

DATA LIST FREE/

```

intquitF Q22 burnout .
BEGIN DATA.
-1.1654 -.3764 4.0181
.0000 -.3764 3.8316
1.1654 -.3764 3.6451
-1.1654 .6236 3.8522
.0000 .6236 3.7338
1.1654 .6236 3.6153
END DATA.

```

GRAPH/SCATTERPLOT=

intquitF WITH burnout BY Q22 .

\*\*\*\*\*

OUTCOME VARIABLE:

clientim

Model Summary

|   | R     | R-sq  | MSE   | F       | df1    | df2      |       |
|---|-------|-------|-------|---------|--------|----------|-------|
| p | .3734 | .1395 | .4771 | 14.1800 | 2.0000 | 175.0000 | .0000 |

Model

|          | coeff  | se    | t      | p     | LLCI   | ULCI   |
|----------|--------|-------|--------|-------|--------|--------|
| constant | 2.8098 | .3242 | 8.6662 | .0000 | 2.1699 | 3.4496 |

|          |        |       |        |       |        |       |
|----------|--------|-------|--------|-------|--------|-------|
| intquitF | -.0367 | .0461 | -.7950 | .4277 | -.1277 | .0544 |
| burnout  | .4108  | .0842 | 4.8773 | .0000 | .2446  | .5771 |

\*\*\*\*\* DIRECT AND INDIRECT EFFECTS OF X ON Y \*\*\*\*\*

Direct effect of X on Y

| Effect | se    | t      | p     | LLCI   | ULCI  |
|--------|-------|--------|-------|--------|-------|
| -.0367 | .0461 | -.7950 | .4277 | -.1277 | .0544 |

Conditional indirect effects of X on Y:

INDIRECT EFFECT:

intquitF -> burnout -> clientim

| Q22    | Effect | BootSE | BootLLCI | BootULCI |
|--------|--------|--------|----------|----------|
| -.3764 | -.0657 | .0250  | -.1223   | -.0234   |
| .6236  | -.0418 | .0346  | -.1202   | .0149    |

Index of moderated mediation (difference between conditional indirect effects):

| Q22 | Index | BootSE | BootLLCI | BootULCI |
|-----|-------|--------|----------|----------|
| Q22 | .0240 | .0387  | -.0597   | .0970    |

---

\*\*\*\*\* ANALYSIS NOTES AND ERRORS \*\*\*\*\*

Level of confidence for all confidence intervals in output:

95.0000

Number of bootstrap samples for percentile bootstrap confidence intervals:

5000

NOTE: The following variables were mean centered prior to analysis:

Q22 intquitF

WARNING: Variables names longer than eight characters can produce incorrect output

when some variables in the data file have the same first eight characters.

Shorter

variable names are recommended. By using this output, you are accepting all risk

and consequences of interpreting or reporting results that may be incorrect

.

----- END MATRIX -----

\* Encoding: UTF-8.

/\* PROCESS version 3.5 \*/.

/\* Written by Andrew F. Hayes \*/.

/\* www.afhayes.com\*/.

/\* www.processmacro.org\*/.

```

/* Copyright 2017-2020 by Andrew F. Hayes */.
/* Documented in http://www.guilford.com/p/hayes3 */.
/* PROCESS workshop schedule at http://www.processmacro.org/workshops.html
*/.

```

```

/* THIS SOFTWARE IS PROVIDED "AS IS", WITHOUT WARRANTY OF ANY KIND */.
/* EXPRESS OR IMPLIED, INCLUDING BUT NOT LIMITED TO THE WARRANTIES OF */.
/* MERCHANTABILITY FITNESS FOR A PARTICULAR PURPOSE AND NONINFRINGEMENT */.
.
/* IN NO EVENT SHALL THE COPYRIGHT HOLDERS BE LIABLE FOR ANY CLAIM, */.
/* DAMAGES OR OTHER LIABILITY, WHETHER IN AN ACTION OF CONTRACT, TORT */.
/* OR OTHERWISE, ARISING FROM, OUT OF OR IN CONNECTION WITH THE */.
/* SOFTWARE OR THE USE OR OTHER DEALINGS IN THE SOFTWARE */.
/* USE OF THIS SOFTWARE IMPLIES AGREEMENT WITH THESE TERMS */.

```

```
set printback=off.
```

## Matrix

Run MATRIX procedure:

```
***** PROCESS Procedure for SPSS Version 3.5 *****
```

Written by Andrew F. Hayes, Ph.D. [www.afhayes.com](http://www.afhayes.com)  
Documentation available in Hayes (2018). [www.guilford.com/p/hayes3](http://www.guilford.com/p/hayes3)

```
*****
```

```

Model   : 7
Y       : clientim
X       : intquitp
M       : burnout
W       : Q22

```

```

Sample
Size: 178

```

```
*****
```

```

OUTCOME VARIABLE:
burnout

```

```

Model Summary

```

|   | R     | R-sq  | MSE   | F       | df1    | df2      |       |
|---|-------|-------|-------|---------|--------|----------|-------|
| p | .4098 | .1680 | .3449 | 11.7078 | 3.0000 | 174.0000 | .0000 |

```

Model

```

|          | coeff  | se    | t       | p     | LLCI   | ULCI   |
|----------|--------|-------|---------|-------|--------|--------|
| constant | 3.7980 | .0447 | 84.9013 | .0000 | 3.7097 | 3.8863 |
| intquitp | -.2697 | .0472 | -5.7165 | .0000 | -.3629 | -.1766 |
| Q22      | -.0490 | .0927 | -.5281  | .5981 | -.2319 | .1340  |
| Int_1    | .0200  | .0972 | .2054   | .8375 | -.1718 | .2117  |

Product terms key:

Int\_1 : intquitp x Q22

Test(s) of highest order unconditional interaction(s):

|     | R2-chng | F     | df1    | df2      | p     |
|-----|---------|-------|--------|----------|-------|
| X*W | .0002   | .0422 | 1.0000 | 174.0000 | .8375 |

-----

Focal predict: intquitp (X)  
Mod var: Q22 (W)

Data for visualizing the conditional effect of the focal predictor:  
Paste text below into a SPSS syntax window and execute to produce plot.

DATA LIST FREE/

```
intquitp Q22 burnout .
BEGIN DATA.
-.9017 -.3764 4.0664
.0000 -.3764 3.8164
.9509 -.3764 3.5528
-.9017 .6236 3.9995
.0000 .6236 3.7675
.9509 .6236 3.5228
```

END DATA.

GRAPH/SCATTERPLOT=

```
intquitp WITH burnout BY Q22 .
```

\*\*\*\*\*

OUTCOME VARIABLE:

clientim

Model Summary

|  | R     | R-sq  | MSE   | F       | df1    | df2      | p     |
|--|-------|-------|-------|---------|--------|----------|-------|
|  | .3781 | .1429 | .4752 | 14.5933 | 2.0000 | 175.0000 | .0000 |

Model

|          | coeff  | se    | t       | p     | LLCI   | ULCI   |
|----------|--------|-------|---------|-------|--------|--------|
| constant | 2.9034 | .3417 | 8.4963  | .0000 | 2.2290 | 3.5779 |
| intquitp | -.0692 | .0597 | -1.1601 | .2476 | -.1870 | .0486  |
| burnout  | .3862  | .0889 | 4.3438  | .0000 | .2107  | .5616  |

\*\*\*\*\* DIRECT AND INDIRECT EFFECTS OF X ON Y \*\*\*\*\*

Direct effect of X on Y

| Effect | se    | t       | p     | LLCI   | ULCI  |
|--------|-------|---------|-------|--------|-------|
| -.0692 | .0597 | -1.1601 | .2476 | -.1870 | .0486 |

Conditional indirect effects of X on Y:

INDIRECT EFFECT:

```
intquitp -> burnout -> clientim
```

| Q22 | Effect | BootSE | BootLLCI | BootULCI |
|-----|--------|--------|----------|----------|
|-----|--------|--------|----------|----------|

```
-.3764    -.1071    .0320    -.1773    -.0511
.6236     -.0994    .0499    -.2174    -.0260
```

Index of moderated mediation (difference between conditional indirect effects):

```
      Index    BootSE    BootLLCI    BootULCI
Q22    .0077     .0439     -.0912     .0840
---
```

\*\*\*\*\* ANALYSIS NOTES AND ERRORS \*\*\*\*\*

Level of confidence for all confidence intervals in output:  
95.0000

Number of bootstrap samples for percentile bootstrap confidence intervals:  
5000

NOTE: The following variables were mean centered prior to analysis:  
 Q22 intquitp

WARNING: Variables names longer than eight characters can produce incorrect output when some variables in the data file have the same first eight characters. Shorter variable names are recommended. By using this output, you are accepting all risk and consequences of interpreting or reporting results that may be incorrect.

----- END MATRIX -----

\* Encoding: UTF-8.

```
/* PROCESS version 3.5 */.
/* Written by Andrew F. Hayes */.
/* www.afhayes.com*/.
/* www.processmacro.org*/.
/* Copyright 2017-2020 by Andrew F. Hayes */.
/* Documented in http://www.guilford.com/p/hayes3 */.
/* PROCESS workshop schedule at http://www.processmacro.org/workshops.html */.
```

```
/* THIS SOFTWARE IS PROVIDED "AS IS", WITHOUT WARRANTY OF ANY KIND */.
/* EXPRESS OR IMPLIED, INCLUDING BUT NOT LIMITED TO THE WARRANTIES OF */.
/* MERCHANTABILITY, FITNESS FOR A PARTICULAR PURPOSE AND NONINFRINGEMENT */.
```

```
/* IN NO EVENT SHALL THE COPYRIGHT HOLDERS BE LIABLE FOR ANY CLAIM, */.
/* DAMAGES OR OTHER LIABILITY, WHETHER IN AN ACTION OF CONTRACT, TORT */.
/* OR OTHERWISE, ARISING FROM, OUT OF OR IN CONNECTION WITH THE */.
/* SOFTWARE OR THE USE OR OTHER DEALINGS IN THE SOFTWARE */.
/* USE OF THIS SOFTWARE IMPLIES AGREEMENT WITH THESE TERMS */.
```

set printback=off.

## Matrix

Run MATRIX procedure:

\*\*\*\*\* PROCESS Procedure for SPSS Version 3.5 \*\*\*\*\*

Written by Andrew F. Hayes, Ph.D.      www.afhayes.com  
Documentation available in Hayes (2018). www.guilford.com/p/hayes3

\*\*\*\*\*

Model : 7  
Y : clientim  
X : burnout  
M : jobsat  
W : Q22

Sample  
Size: 178

\*\*\*\*\*

OUTCOME VARIABLE:  
jobsat

### Model Summary

|   | R     | R-sq  | MSE   | F       | df1    | df2      |       |
|---|-------|-------|-------|---------|--------|----------|-------|
| p | .4997 | .2497 | .3389 | 19.2986 | 3.0000 | 174.0000 | .0000 |

### Model

|          | coeff  | se    | t       | p     | LLCI   | ULCI   |
|----------|--------|-------|---------|-------|--------|--------|
| constant | 3.9709 | .0439 | 90.4985 | .0000 | 3.8843 | 4.0575 |
| burnout  | .4901  | .0697 | 7.0270  | .0000 | .3525  | .6278  |
| Q22      | -.1632 | .0907 | -1.8004 | .0735 | -.3421 | .0157  |
| Int_1    | .0358  | .1385 | .2584   | .7964 | -.2376 | .3092  |

### Product terms key:

Int\_1 : burnout x Q22

### Test(s) of highest order unconditional interaction(s):

|     | R2-chng | F     | df1    | df2      | p     |
|-----|---------|-------|--------|----------|-------|
| X*W | .0003   | .0668 | 1.0000 | 174.0000 | .7964 |

-----

Focal predict: burnout (X)  
Mod var: Q22 (W)

Data for visualizing the conditional effect of the focal predictor:  
Paste text below into a SPSS syntax window and execute to produce plot.

```
DATA LIST FREE/  
  burnout Q22 jobsat .  
BEGIN DATA.
```

|        |        |        |
|--------|--------|--------|
| -.6384 | -.3764 | 3.7280 |
| .0000  | -.3764 | 4.0323 |
| .6384  | -.3764 | 4.3366 |
| -.6384 | .6236  | 3.5419 |
| .0000  | .6236  | 3.8691 |
| .6384  | .6236  | 4.1962 |

END DATA.

GRAPH/SCATTERPLOT=

burnout WITH jobsat BY Q22 .

\*\*\*\*\*

OUTCOME VARIABLE:

clientim

Model Summary

|   | R     | R-sq  | MSE   | F       | df1    | df2      |       |
|---|-------|-------|-------|---------|--------|----------|-------|
| p | .3925 | .1541 | .4690 | 15.9351 | 2.0000 | 175.0000 | .0000 |

Model

|          | coeff  | se    | t       | p     | LLCI   | ULCI   |
|----------|--------|-------|---------|-------|--------|--------|
| constant | 3.6996 | .3544 | 10.4392 | .0000 | 3.0002 | 4.3991 |
| burnout  | .3427  | .0922 | 3.7162  | .0003 | .1607  | .5247  |
| jobsat   | .1691  | .0883 | 1.9140  | .0572 | -.0053 | .3434  |

\*\*\*\*\* DIRECT AND INDIRECT EFFECTS OF X ON Y \*\*\*\*\*

Direct effect of X on Y

| Effect | se    | t      | p     | LLCI  | ULCI  |
|--------|-------|--------|-------|-------|-------|
| .3427  | .0922 | 3.7162 | .0003 | .1607 | .5247 |

Conditional indirect effects of X on Y:

INDIRECT EFFECT:

burnout -> jobsat -> clientim

| Q22    | Effect | BootSE | BootLLCI | BootULCI |
|--------|--------|--------|----------|----------|
| -.3764 | .0806  | .0447  | -.0068   | .1727    |
| .6236  | .0866  | .0501  | -.0060   | .1918    |

Index of moderated mediation (difference between conditional indirect effects):

|     | Index | BootSE | BootLLCI | BootULCI |
|-----|-------|--------|----------|----------|
| Q22 | .0061 | .0253  | -.0416   | .0647    |

---

\*\*\*\*\* ANALYSIS NOTES AND ERRORS \*\*\*\*\*

Level of confidence for all confidence intervals in output:

95.0000

Number of bootstrap samples for percentile bootstrap confidence intervals:

5000

NOTE: The following variables were mean centered prior to analysis:  
Q22 burnout

WARNING: Variables names longer than eight characters can produce incorrect output when some variables in the data file have the same first eight characters. Shorter variable names are recommended. By using this output, you are accepting all risk and consequences of interpreting or reporting results that may be incorrect.

----- END MATRIX -----

\* Encoding: UTF-8.

/\* PROCESS version 3.5 \*/.  
/\* Written by Andrew F. Hayes \*/.  
/\* www.afhayes.com\*/.  
/\* www.processmacro.org\*/.  
/\* Copyright 2017-2020 by Andrew F. Hayes \*/.  
/\* Documented in <http://www.guilford.com/p/hayes3> \*/.  
/\* PROCESS workshop schedule at <http://www.processmacro.org/workshops.html> \*/.

/\* THIS SOFTWARE IS PROVIDED "AS IS", WITHOUT WARRANTY OF ANY KIND \*/.  
/\* EXPRESS OR IMPLIED, INCLUDING BUT NOT LIMITED TO THE WARRANTIES OF \*/.  
/\* MERCHANTABILITY, FITNESS FOR A PARTICULAR PURPOSE AND NONINFRINGEMENT \*/.  
/\* IN NO EVENT SHALL THE COPYRIGHT HOLDERS BE LIABLE FOR ANY CLAIM, \*/.  
/\* DAMAGES OR OTHER LIABILITY, WHETHER IN AN ACTION OF CONTRACT, TORT \*/.  
/\* OR OTHERWISE, ARISING FROM, OUT OF OR IN CONNECTION WITH THE \*/.  
/\* SOFTWARE OR THE USE OR OTHER DEALINGS IN THE SOFTWARE \*/.  
/\* USE OF THIS SOFTWARE IMPLIES AGREEMENT WITH THESE TERMS \*/.

set printback=off.

## Matrix

Run MATRIX procedure:

\*\*\*\*\* PROCESS Procedure for SPSS Version 3.5 \*\*\*\*\*

Written by Andrew F. Hayes, Ph.D. [www.afhayes.com](http://www.afhayes.com)  
Documentation available in Hayes (2018). [www.guilford.com/p/hayes3](http://www.guilford.com/p/hayes3)

\*\*\*\*\*

Model : 7  
Y : clientim  
X : burnout

M : engaged  
W : Q22

Sample  
Size: 178

\*\*\*\*\*

OUTCOME VARIABLE:  
engaged

Model Summary

|   | R     | R-sq  | MSE   | F       | df1    | df2      |       |
|---|-------|-------|-------|---------|--------|----------|-------|
| p | .4450 | .1980 | .2933 | 14.3202 | 3.0000 | 174.0000 | .0000 |

Model

|          | coeff  | se    | t        | p     | LLCI   | ULCI   |
|----------|--------|-------|----------|-------|--------|--------|
| constant | 4.1357 | .0408 | 101.3175 | .0000 | 4.0551 | 4.2163 |
| burnout  | .3473  | .0649 | 5.3520   | .0000 | .2192  | .4753  |
| Q22      | -.1692 | .0843 | -2.0065  | .0464 | -.3357 | -.0028 |
| Int_1    | .2332  | .1289 | 1.8096   | .0721 | -.0211 | .4876  |

Product terms key:

Int\_1 : burnout x Q22

Test(s) of highest order unconditional interaction(s):

|     | R2-chng | F      | df1    | df2      | p     |
|-----|---------|--------|--------|----------|-------|
| X*W | .0151   | 3.2748 | 1.0000 | 174.0000 | .0721 |

-----

Focal predict: burnout (X)  
Mod var: Q22 (W)

Conditional effects of the focal predictor at values of the moderator(s):

|    | Q22    | Effect | se    | t      | p     | LLCI  | UL    |
|----|--------|--------|-------|--------|-------|-------|-------|
| CI | -.3764 | .2595  | .0867 | 2.9936 | .0032 | .0884 | .4306 |
|    | .6236  | .4927  | .0954 | 5.1665 | .0000 | .3045 | .6809 |

Data for visualizing the conditional effect of the focal predictor:  
Paste text below into a SPSS syntax window and execute to produce plot.

DATA LIST FREE/

```
burnout Q22 engaged .  
BEGIN DATA.  
-.6384 -.3764 4.0338  
.0000 -.3764 4.1994  
.6384 -.3764 4.3651  
-.6384 .6236 3.7157  
.0000 .6236 4.0302
```

.6384 .6236 4.3447

END DATA.

GRAPH/SCATTERPLOT=

burnout WITH engaged BY Q22 .

\*\*\*\*\*

OUTCOME VARIABLE:

clientim

Model Summary

|   | R     | R-sq  | MSE   | F       | df1    | df2      |       |
|---|-------|-------|-------|---------|--------|----------|-------|
| p | .5191 | .2694 | .4051 | 32.2705 | 2.0000 | 175.0000 | .0000 |

Model

|          | coeff  | se    | t      | p     | LLCI   | ULCI   |
|----------|--------|-------|--------|-------|--------|--------|
| constant | 2.3382 | .3631 | 6.4391 | .0000 | 1.6216 | 3.0549 |
| burnout  | .2415  | .0819 | 2.9482 | .0036 | .0798  | .4032  |
| engaged  | .4924  | .0872 | 5.6462 | .0000 | .3203  | .6645  |

\*\*\*\*\* DIRECT AND INDIRECT EFFECTS OF X ON Y \*\*\*\*\*

Direct effect of X on Y

| Effect | se    | t      | p     | LLCI  | ULCI  |
|--------|-------|--------|-------|-------|-------|
| .2415  | .0819 | 2.9482 | .0036 | .0798 | .4032 |

Conditional indirect effects of X on Y:

INDIRECT EFFECT:

burnout -> engaged -> clientim

| Q22    | Effect | BootSE | BootLLCI | BootULCI |
|--------|--------|--------|----------|----------|
| -.3764 | .1278  | .0501  | .0443    | .2378    |
| .6236  | .2426  | .0785  | .1096    | .4186    |

Index of moderated mediation (difference between conditional indirect effects):

|     | Index | BootSE | BootLLCI | BootULCI |
|-----|-------|--------|----------|----------|
| Q22 | .1148 | .0672  | -.0058   | .2614    |

---

\*\*\*\*\* ANALYSIS NOTES AND ERRORS \*\*\*\*\*

Level of confidence for all confidence intervals in output:

95.0000

Number of bootstrap samples for percentile bootstrap confidence intervals:

5000

NOTE: The following variables were mean centered prior to analysis:

Q22 burnout

WARNING: Variables names longer than eight characters can produce incorrect output when some variables in the data file have the same first eight characters. Shorter variable names are recommended. By using this output, you are accepting all risk and consequences of interpreting or reporting results that may be incorrect .

----- END MATRIX -----

\* Encoding: UTF-8.

/\* PROCESS version 3.5 \*/.  
/\* Written by Andrew F. Hayes \*/.  
/\* www.afhayes.com\*/.  
/\* www.processmacro.org\*/.  
/\* Copyright 2017-2020 by Andrew F. Hayes \*/.  
/\* Documented in <http://www.guilford.com/p/hayes3> \*/.  
/\* PROCESS workshop schedule at <http://www.processmacro.org/workshops.html> \*/.  
\*/.

/\* THIS SOFTWARE IS PROVIDED "AS IS", WITHOUT WARRANTY OF ANY KIND \*/.  
/\* EXPRESS OR IMPLIED, INCLUDING BUT NOT LIMITED TO THE WARRANTIES OF \*/.  
/\* MERCHANTABILITY FITNESS FOR A PARTICULAR PURPOSE AND NONINFRINGEMENT \*/.  
.  
/\* IN NO EVENT SHALL THE COPYRIGHT HOLDERS BE LIABLE FOR ANY CLAIM, \*/.  
/\* DAMAGES OR OTHER LIABILITY, WHETHER IN AN ACTION OF CONTRACT, TORT \*/.  
/\* OR OTHERWISE, ARISING FROM, OUT OF OR IN CONNECTION WITH THE \*/.  
/\* SOFTWARE OR THE USE OR OTHER DEALINGS IN THE SOFTWARE \*/.  
/\* USE OF THIS SOFTWARE IMPLIES AGREEMENT WITH THESE TERMS \*/.

set printback=off.

## Matrix

Run MATRIX procedure:

\*\*\*\*\* PROCESS Procedure for SPSS Version 3.5 \*\*\*\*\*

Written by Andrew F. Hayes, Ph.D.            [www.afhayes.com](http://www.afhayes.com)  
Documentation available in Hayes (2018). [www.guilford.com/p/hayes3](http://www.guilford.com/p/hayes3)

\*\*\*\*\*

Model    : 7  
      Y    : clientim  
      X    : burnout  
      M    : wellbein  
      W    : Q22

Sample  
Size: 178

\*\*\*\*\*

OUTCOME VARIABLE:

wellbein

Model Summary

|   | R     | R-sq  | MSE   | F       | df1    | df2      |       |
|---|-------|-------|-------|---------|--------|----------|-------|
| p | .4493 | .2019 | .6708 | 14.6726 | 3.0000 | 174.0000 | .0000 |

Model

|          | coeff  | se    | t       | p     | LLCI   | ULCI   |
|----------|--------|-------|---------|-------|--------|--------|
| constant | 4.2501 | .0617 | 68.8498 | .0000 | 4.1282 | 4.3719 |
| burnout  | .5725  | .0981 | 5.8347  | .0000 | .3789  | .7662  |
| Q22      | -.3190 | .1275 | -2.5010 | .0133 | -.5707 | -.0673 |
| Int_1    | -.3149 | .1949 | -1.6158 | .1080 | -.6995 | .0698  |

Product terms key:

Int\_1 : burnout x Q22

Test(s) of highest order unconditional interaction(s):

|     | R2-chng | F      | df1    | df2      | p     |
|-----|---------|--------|--------|----------|-------|
| X*W | .0120   | 2.6107 | 1.0000 | 174.0000 | .1080 |

-----

Focal predict: burnout (X)  
Mod var: Q22 (W)

Data for visualizing the conditional effect of the focal predictor:  
Paste text below into a SPSS syntax window and execute to produce plot.

DATA LIST FREE/

```

burnout Q22 wellbein .
BEGIN DATA.
-.6384 -.3764 3.9290
.0000 -.3764 4.3701
.6384 -.3764 4.8113
-.6384 .6236 3.8110
.0000 .6236 4.0511
.6384 .6236 4.2913

```

END DATA.

GRAPH/SCATTERPLOT=

burnout WITH wellbein BY Q22 .

\*\*\*\*\*

OUTCOME VARIABLE:

clientim

Model Summary

|   | R     | R-sq  | MSE   | F       | df1    | df2      |       |
|---|-------|-------|-------|---------|--------|----------|-------|
| p | .3879 | .1505 | .4710 | 15.4982 | 2.0000 | 175.0000 | .0000 |

| Model    | coeff  | se    | t       | p     | LLCI   | ULCI   |
|----------|--------|-------|---------|-------|--------|--------|
| constant | 3.9202 | .2692 | 14.5638 | .0000 | 3.3889 | 4.4514 |
| burnout  | .3675  | .0883 | 4.1623  | .0000 | .1933  | .5418  |
| wellbein | .1058  | .0620 | 1.7055  | .0899 | -.0166 | .2282  |

\*\*\*\*\* DIRECT AND INDIRECT EFFECTS OF X ON Y \*\*\*\*\*

Direct effect of X on Y

| Effect | se    | t      | p     | LLCI  | ULCI  |
|--------|-------|--------|-------|-------|-------|
| .3675  | .0883 | 4.1623 | .0000 | .1933 | .5418 |

Conditional indirect effects of X on Y:

INDIRECT EFFECT:

burnout -> wellbein -> clientim

| Q22    | Effect | BootSE | BootLLCI | BootULCI |
|--------|--------|--------|----------|----------|
| -.3764 | .0731  | .0410  | .0018    | .1627    |
| .6236  | .0398  | .0347  | -.0038   | .1293    |

Index of moderated mediation (difference between conditional indirect effects):

| Q22 | Index  | BootSE | BootLLCI | BootULCI |
|-----|--------|--------|----------|----------|
| --- | -.0333 | .0259  | -.0879   | .0123    |

\*\*\*\*\* ANALYSIS NOTES AND ERRORS \*\*\*\*\*

Level of confidence for all confidence intervals in output:

95.0000

Number of bootstrap samples for percentile bootstrap confidence intervals:

5000

NOTE: The following variables were mean centered prior to analysis:

Q22 burnout

WARNING: Variables names longer than eight characters can produce incorrect output

when some variables in the data file have the same first eight characters. Shorter

variable names are recommended. By using this output, you are accepting all risk

and consequences of interpreting or reporting results that may be incorrect.

----- END MATRIX -----

\* Encoding: UTF-8.

```

/* PROCESS version 3.5 */.
/* Written by Andrew F. Hayes */.
/* www.afhayes.com*/.
/* www.processmacro.org*/.
/* Copyright 2017-2020 by Andrew F. Hayes */.
/* Documented in http://www.guilford.com/p/hayes3 */.
/* PROCESS workshop schedule at http://www.processmacro.org/workshops.html
*/.

```

```

/* THIS SOFTWARE IS PROVIDED "AS IS", WITHOUT WARRANTY OF ANY KIND */.
/* EXPRESS OR IMPLIED, INCLUDING BUT NOT LIMITED TO THE WARRANTIES OF */.
/* MERCHANTABILITY FITNESS FOR A PARTICULAR PURPOSE AND NONINFRINGEMENT*/.
.

```

```

/* IN NO EVENT SHALL THE COPYRIGHT HOLDERS BE LIABLE FOR ANY CLAIM, */.
/* DAMAGES OR OTHER LIABILITY, WHETHER IN AN ACTION OF CONTRACT, TORT */.
/* OR OTHERWISE, ARISING FROM, OUT OF OR IN CONNECTION WITH THE */.
/* SOFTWARE OR THE USE OR OTHER DEALINGS IN THE SOFTWARE */.
/* USE OF THIS SOFTWARE IMPLIES AGREEMENT WITH THESE TERMS */.

```

```
set printback=off.
```

## Matrix

Run MATRIX procedure:

```
***** PROCESS Procedure for SPSS Version 3.5 *****
```

```

                Written by Andrew F. Hayes, Ph.D.      www.afhayes.com
Documentation available in Hayes (2018). www.guilford.com/p/hayes3

```

```
*****
```

```

Model   : 7
Y       : clientim
X       : burnout
M       : intquitF
W       : Q22

```

```

Sample
Size: 178

```

```
*****
```

```

OUTCOME VARIABLE:
intquitF

```

```

Model Summary

```

|   | R     | R-sq  | MSE    | F      | df1    | df2      |     |
|---|-------|-------|--------|--------|--------|----------|-----|
| p | .2969 | .0881 | 1.2598 | 5.6051 | 3.0000 | 174.0000 | .00 |

```

Model

```

|          | coeff  | se    | t       | p     | LLCI   | ULCI   |
|----------|--------|-------|---------|-------|--------|--------|
| constant | 2.3944 | .0846 | 28.3045 | .0000 | 2.2274 | 2.5613 |
| burnout  | -.4734 | .1345 | -3.5207 | .0005 | -.7388 | -.2080 |

|       |       |       |        |       |        |       |
|-------|-------|-------|--------|-------|--------|-------|
| Q22   | .2953 | .1748 | 1.6898 | .0929 | -.0496 | .6403 |
| Int_1 | .2879 | .2671 | 1.0779 | .2826 | -.2393 | .8150 |

Product terms key:

Int\_1 : burnout x Q22

Test(s) of highest order unconditional interaction(s):

|     | R2-chng | F      | df1    | df2      | p     |
|-----|---------|--------|--------|----------|-------|
| X*W | .0061   | 1.1618 | 1.0000 | 174.0000 | .2826 |

-----

Focal predict: burnout (X)  
 Mod var: Q22 (W)

Data for visualizing the conditional effect of the focal predictor:  
 Paste text below into a SPSS syntax window and execute to produce plot.

DATA LIST FREE/

```

burnout      Q22      intquitF      .
BEGIN DATA.
  -.6384      -.3764      2.6546
   .0000      -.3764      2.2832
   .6384      -.3764      1.9118
  -.6384      .6236      2.7662
   .0000      .6236      2.5786
   .6384      .6236      2.3909
END DATA.

```

GRAPH/SCATTERPLOT=

burnout WITH intquitF BY Q22 .

\*\*\*\*\*

OUTCOME VARIABLE:

clientim

Model Summary

|       | R     | R-sq  | MSE   | F       | df1    | df2      | p     |
|-------|-------|-------|-------|---------|--------|----------|-------|
| Model | .3734 | .1395 | .4771 | 14.1800 | 2.0000 | 175.0000 | .0000 |

Model

|          | coeff  | se    | t       | p     | LLCI   | ULCI   |
|----------|--------|-------|---------|-------|--------|--------|
| constant | 4.4583 | .1216 | 36.6600 | .0000 | 4.2183 | 4.6983 |
| burnout  | .4108  | .0842 | 4.8773  | .0000 | .2446  | .5771  |
| intquitF | -.0367 | .0461 | -.7950  | .4277 | -.1277 | .0544  |

\*\*\*\*\* DIRECT AND INDIRECT EFFECTS OF X ON Y \*\*\*\*\*

Direct effect of X on Y

| Effect | se    | t      | p     | LLCI  | ULCI  |
|--------|-------|--------|-------|-------|-------|
| .4108  | .0842 | 4.8773 | .0000 | .2446 | .5771 |

Conditional indirect effects of X on Y:

INDIRECT EFFECT:

burnout -> intquitF -> clientim

| Q22    | Effect | BootSE | BootLLCI | BootULCI |
|--------|--------|--------|----------|----------|
| -.3764 | .0213  | .0282  | -.0346   | .0793    |
| .6236  | .0108  | .0183  | -.0207   | .0544    |

Index of moderated mediation (difference between conditional indirect effects):

| Q22 | Index  | BootSE | BootLLCI | BootULCI |
|-----|--------|--------|----------|----------|
| --- | -.0106 | .0200  | -.0617   | .0234    |

\*\*\*\*\* ANALYSIS NOTES AND ERRORS \*\*\*\*\*

Level of confidence for all confidence intervals in output:  
95.0000

Number of bootstrap samples for percentile bootstrap confidence intervals:  
5000

NOTE: The following variables were mean centered prior to analysis:  
Q22 burnout

WARNING: Variables names longer than eight characters can produce incorrect output when some variables in the data file have the same first eight characters. Shorter variable names are recommended. By using this output, you are accepting all risk and consequences of interpreting or reporting results that may be incorrect.

----- END MATRIX -----

\* Encoding: UTF-8.

/\* PROCESS version 3.5 \*/.  
/\* Written by Andrew F. Hayes \*/.  
/\* www.afhayes.com\*/.  
/\* www.processmacro.org\*/.  
/\* Copyright 2017-2020 by Andrew F. Hayes \*/.  
/\* Documented in <http://www.guilford.com/p/hayes3> \*/.  
/\* PROCESS workshop schedule at <http://www.processmacro.org/workshops.html> \*/.

/\* THIS SOFTWARE IS PROVIDED "AS IS", WITHOUT WARRANTY OF ANY KIND \*/.  
/\* EXPRESS OR IMPLIED, INCLUDING BUT NOT LIMITED TO THE WARRANTIES OF \*/.  
/\* MERCHANTABILITY FITNESS FOR A PARTICULAR PURPOSE AND NONINFRINGEMENT \*/.  
/\* IN NO EVENT SHALL THE COPYRIGHT HOLDERS BE LIABLE FOR ANY CLAIM, \*/.  
/\* DAMAGES OR OTHER LIABILITY, WHETHER IN AN ACTION OF CONTRACT, TORT \*/.

```
/* OR OTHERWISE, ARISING FROM, OUT OF OR IN CONNECTION WITH THE */.  
/* SOFTWARE OR THE USE OR OTHER DEALINGS IN THE SOFTWARE */.  
/* USE OF THIS SOFTWARE IMPLIES AGREEMENT WITH THESE TERMS */.
```

```
set printback=off.
```

## Matrix

Run MATRIX procedure:

```
***** PROCESS Procedure for SPSS Version 3.5 *****
```

```
Written by Andrew F. Hayes, Ph.D.      www.afhayes.com  
Documentation available in Hayes (2018). www.guilford.com/p/hayes3
```

```
*****
```

```
Model   : 7  
Y       : clientim  
X       : burnout  
M       : intquitp  
W       : Q22
```

```
Sample  
Size: 178
```

```
*****
```

```
OUTCOME VARIABLE:  
intquitp
```

### Model Summary

|   | R     | R-sq  | MSE   | F       | df1    | df2      |       |
|---|-------|-------|-------|---------|--------|----------|-------|
| p | .4355 | .1897 | .7453 | 13.5752 | 3.0000 | 174.0000 | .0000 |

### Model

|          | coeff  | se    | t       | p     | LLCI   | ULCI   |
|----------|--------|-------|---------|-------|--------|--------|
| constant | 1.9087 | .0651 | 29.3347 | .0000 | 1.7802 | 2.0371 |
| burnout  | -.6019 | .1034 | -5.8199 | .0000 | -.8061 | -.3978 |
| Q22      | .2714  | .1344 | 2.0185  | .0451 | .0060  | .5367  |
| Int_1    | .2100  | .2054 | 1.0222  | .3081 | -.1955 | .6154  |

### Product terms key:

```
Int_1   :      burnout x      Q22
```

### Test(s) of highest order unconditional interaction(s):

|     | R2-chng | F      | df1    | df2      | p     |
|-----|---------|--------|--------|----------|-------|
| X*W | .0049   | 1.0449 | 1.0000 | 174.0000 | .3081 |

```
-----
```

```
Focal predict: burnout (X)  
Mod var: Q22 (W)
```

Data for visualizing the conditional effect of the focal predictor:  
Paste text below into a SPSS syntax window and execute to produce plot.

```

DATA LIST FREE/
  burnout      Q22      intquitp  .
BEGIN DATA.
  -.6384      -.3764      2.2412
   .0000      -.3764      1.8065
   .6384      -.3764      1.3718
  -.6384      .6236      2.3785
   .0000      .6236      2.0779
   .6384      .6236      1.7772

```

```

END DATA.
GRAPH/SCATTERPLOT=
  burnout WITH      intquitp BY      Q22      .

```

```

*****
OUTCOME VARIABLE:
  clientim

```

```

Model Summary
      R      R-sq      MSE      F      df1      df2
p
.3781      .1429      .4752      14.5933      2.0000      175.0000      .00
00

```

```

Model
      coeff      se      t      p      LLCI      ULCI
constant      4.5025      .1247      36.1026      .0000      4.2563      4.7486
burnout      .3862      .0889      4.3438      .0000      .2107      .5616
intquitp      -.0692      .0597      -1.1601      .2476      -.1870      .0486

```

```

***** DIRECT AND INDIRECT EFFECTS OF X ON Y *****

```

```

Direct effect of X on Y
      Effect      se      t      p      LLCI      ULCI
      .3862      .0889      4.3438      .0000      .2107      .5616

```

```

Conditional indirect effects of X on Y:

```

```

INDIRECT EFFECT:
  burnout      ->      intquitp      ->      clientim

      Q22      Effect      BootSE      BootLLCI      BootULCI
      -.3764      .0472      .0370      -.0278      .1179
      .6236      .0326      .0301      -.0180      .1010

```

```

Index of moderated mediation (difference between conditional indirect effects):

```

```

      Index      BootSE      BootLLCI      BootULCI
Q22      -.0145      .0183      -.0560      .0202
---
```

```

***** ANALYSIS NOTES AND ERRORS *****

```

Level of confidence for all confidence intervals in output:  
95.0000

Number of bootstrap samples for percentile bootstrap confidence intervals:  
5000

NOTE: The following variables were mean centered prior to analysis:  
Q22 burnout

WARNING: Variables names longer than eight characters can produce incorrect output when some variables in the data file have the same first eight characters. Shorter variable names are recommended. By using this output, you are accepting all risk and consequences of interpreting or reporting results that may be incorrect.

----- END MATRIX -----

\* Encoding: UTF-8.

/\* PROCESS version 3.5 \*/.  
/\* Written by Andrew F. Hayes \*/.  
/\* www.afhayes.com\*/.  
/\* www.processmacro.org\*/.  
/\* Copyright 2017-2020 by Andrew F. Hayes \*/.  
/\* Documented in <http://www.guilford.com/p/hayes3> \*/.  
/\* PROCESS workshop schedule at <http://www.processmacro.org/workshops.html> \*/.  
\*/.

/\* THIS SOFTWARE IS PROVIDED "AS IS", WITHOUT WARRANTY OF ANY KIND \*/.  
/\* EXPRESS OR IMPLIED, INCLUDING BUT NOT LIMITED TO THE WARRANTIES OF \*/.  
/\* MERCHANTABILITY, FITNESS FOR A PARTICULAR PURPOSE AND NONINFRINGEMENT \*/.

/\* IN NO EVENT SHALL THE COPYRIGHT HOLDERS BE LIABLE FOR ANY CLAIM, \*/.  
/\* DAMAGES OR OTHER LIABILITY, WHETHER IN AN ACTION OF CONTRACT, TORT \*/.  
/\* OR OTHERWISE, ARISING FROM, OUT OF OR IN CONNECTION WITH THE \*/.  
/\* SOFTWARE OR THE USE OR OTHER DEALINGS IN THE SOFTWARE \*/.  
/\* USE OF THIS SOFTWARE IMPLIES AGREEMENT WITH THESE TERMS \*/.

set printback=off.

## Matrix

Run MATRIX procedure:

\*\*\*\*\* PROCESS Procedure for SPSS Version 3.5 \*\*\*\*\*

Written by Andrew F. Hayes, Ph.D. [www.afhayes.com](http://www.afhayes.com)  
Documentation available in Hayes (2018). [www.guilford.com/p/hayes3](http://www.guilford.com/p/hayes3)

```

*****
Model   : 7
  Y     : burnout
  X     : Q22
  M     : intquitp
  W     : clientim

```

```

Sample
Size: 178

```

```

*****
OUTCOME VARIABLE:
  intquitp

```

```

Model Summary

```

|   | R     | R-sq  | MSE   | F      | df1    | df2      |       |
|---|-------|-------|-------|--------|--------|----------|-------|
| p | .3084 | .0951 | .8323 | 6.0946 | 3.0000 | 174.0000 | .0006 |

```

Model

```

|          | coeff  | se    | t       | p     | LLCI   | ULCI   |
|----------|--------|-------|---------|-------|--------|--------|
| constant | 1.8951 | .0685 | 27.6741 | .0000 | 1.7599 | 2.0302 |
| Q22      | .3188  | .1414 | 2.2544  | .0254 | .0397  | .5979  |
| clientim | -.2923 | .0931 | -3.1388 | .0020 | -.4760 | -.1085 |
| Int_1    | -.3526 | .1966 | -1.7934 | .0747 | -.7406 | .0355  |

```

Product terms key:
  Int_1   :      Q22      x      clientim

```

```

Test(s) of highest order unconditional interaction(s):

```

|     | R2-chng | F      | df1    | df2      | p     |
|-----|---------|--------|--------|----------|-------|
| X*W | .0167   | 3.2161 | 1.0000 | 174.0000 | .0747 |

```

-----
  Focal predict: Q22      (X)
  Mod var: clientim (W)

```

```

Conditional effects of the focal predictor at values of the moderator(s):

```

| clientim | Effect | se    | t      | p     | LLCI   | UL  |
|----------|--------|-------|--------|-------|--------|-----|
| CI       |        |       |        |       |        |     |
| -.7404   | .5798  | .1996 | 2.9042 | .0042 | .1858  | .97 |
| 38       |        |       |        |       |        |     |
| .0000    | .3188  | .1414 | 2.2544 | .0254 | .0397  | .59 |
| 79       |        |       |        |       |        |     |
| .6292    | .0969  | .1908 | .5080  | .6121 | -.2797 | .47 |
| 36       |        |       |        |       |        |     |

```

Moderator value(s) defining Johnson-Neyman significance region(s):
  Value  % below  % above
  .1012  48.3146  51.6854

```

```

Conditional effect of focal predictor at values of the moderator:

```

|    | clientim | Effect | se    | t      | p     | LLCI   | UL   |
|----|----------|--------|-------|--------|-------|--------|------|
| CI | -3.3708  | 1.5072 | .6731 | 2.2391 | .0264 | .1786  | 2.83 |
| 57 | -3.1708  | 1.4367 | .6347 | 2.2634 | .0248 | .1839  | 2.68 |
| 94 | -2.9708  | 1.3661 | .5965 | 2.2904 | .0232 | .1889  | 2.54 |
| 34 | -2.7708  | 1.2956 | .5583 | 2.3205 | .0215 | .1936  | 2.39 |
| 76 | -2.5708  | 1.2251 | .5204 | 2.3542 | .0197 | .1980  | 2.25 |
| 22 | -2.3708  | 1.1546 | .4827 | 2.3921 | .0178 | .2020  | 2.10 |
| 73 | -2.1708  | 1.0841 | .4452 | 2.4349 | .0159 | .2053  | 1.96 |
| 28 | -1.9708  | 1.0136 | .4081 | 2.4834 | .0140 | .2080  | 1.81 |
| 91 | -1.7708  | .9431  | .3715 | 2.5386 | .0120 | .2098  | 1.67 |
| 63 | -1.5708  | .8726  | .3355 | 2.6010 | .0101 | .2104  | 1.53 |
| 47 | -1.3708  | .8021  | .3003 | 2.6711 | .0083 | .2094  | 1.39 |
| 47 | -1.1708  | .7315  | .2662 | 2.7478 | .0066 | .2061  | 1.25 |
| 70 | -.9708   | .6610  | .2338 | 2.8269 | .0053 | .1995  | 1.12 |
| 26 | -.7708   | .5905  | .2039 | 2.8961 | .0043 | .1881  | .99  |
| 30 | -.5708   | .5200  | .1777 | 2.9269 | .0039 | .1694  | .87  |
| 07 | -.3708   | .4495  | .1570 | 2.8633 | .0047 | .1397  | .75  |
| 93 | -.1708   | .3790  | .1443 | 2.6267 | .0094 | .0942  | .66  |
| 38 | .0292    | .3085  | .1417 | 2.1769 | .0308 | .0288  | .58  |
| 82 | .1012    | .2831  | .1434 | 1.9737 | .0500 | .0000  | .56  |
| 62 | .2292    | .2380  | .1498 | 1.5887 | .1139 | -.0577 | .53  |
| 36 | .4292    | .1675  | .1670 | 1.0028 | .3173 | -.1621 | .49  |
| 70 | .6292    | .0969  | .1908 | .5080  | .6121 | -.2797 | .47  |
| 36 |          |        |       |        |       |        |      |

Data for visualizing the conditional effect of the focal predictor:  
 Paste text below into a SPSS syntax window and execute to produce plot.

```
DATA LIST FREE/
  Q22      clientim  intquitp  .
BEGIN DATA.
```

|        |        |        |
|--------|--------|--------|
| -.3764 | -.7404 | 1.8932 |
| .6236  | -.7404 | 2.4730 |
| -.3764 | .0000  | 1.7751 |
| .6236  | .0000  | 2.0939 |
| -.3764 | .6292  | 1.6747 |
| .6236  | .6292  | 1.7716 |

END DATA.

GRAPH/SCATTERPLOT=

clientim WITH intquitp BY Q22 .

\*\*\*\*\*

OUTCOME VARIABLE:

burnout

Model Summary

|   | R     | R-sq  | MSE   | F       | df1    | df2      |       |
|---|-------|-------|-------|---------|--------|----------|-------|
| p | .4096 | .1678 | .3430 | 17.6372 | 2.0000 | 175.0000 | .0000 |

Model

|          | coeff  | se    | t       | p     | LLCI   | ULCI   |
|----------|--------|-------|---------|-------|--------|--------|
| constant | 4.3124 | .0997 | 43.2671 | .0000 | 4.1157 | 4.5091 |
| Q22      | -.0473 | .0921 | -.5133  | .6084 | -.2290 | .1345  |
| intquitp | -.2696 | .0471 | -5.7305 | .0000 | -.3625 | -.1768 |

\*\*\*\*\* DIRECT AND INDIRECT EFFECTS OF X ON Y \*\*\*\*\*

Direct effect of X on Y

| Effect | se    | t      | p     | LLCI   | ULCI  |
|--------|-------|--------|-------|--------|-------|
| -.0473 | .0921 | -.5133 | .6084 | -.2290 | .1345 |

Conditional indirect effects of X on Y:

INDIRECT EFFECT:

Q22 -> intquitp -> burnout

| clientim | Effect | BootSE | BootLLCI | BootULCI |
|----------|--------|--------|----------|----------|
| -.7404   | -.1563 | .0612  | -.2850   | -.0445   |
| .0000    | -.0860 | .0397  | -.1682   | -.0123   |
| .6292    | -.0261 | .0474  | -.1206   | .0681    |

Index of moderated mediation:

| clientim | Index | BootSE | BootLLCI | BootULCI |
|----------|-------|--------|----------|----------|
|          | .0951 | .0540  | -.0108   | .2061    |

---

\*\*\*\*\* ANALYSIS NOTES AND ERRORS \*\*\*\*\*

Level of confidence for all confidence intervals in output:

95.0000

Number of bootstrap samples for percentile bootstrap confidence intervals:

5000

W values in conditional tables are 1 SD below the mean, the mean, and the maximum.

NOTE: One SD above the mean is above the maximum observed in the data for W,  
so the maximum measurement for W is used for conditioning instead.

NOTE: The following variables were mean centered prior to analysis:  
clientim Q22

WARNING: Variables names longer than eight characters can produce incorrect output when some variables in the data file have the same first eight characters. Shorter variable names are recommended. By using this output, you are accepting all risk and consequences of interpreting or reporting results that may be incorrect.

----- END MATRIX -----

\* Encoding: UTF-8.

/\* PROCESS version 3.5 \*/.  
/\* Written by Andrew F. Hayes \*/.  
/\* www.afhayes.com\*/.  
/\* www.processmacro.org\*/.  
/\* Copyright 2017-2020 by Andrew F. Hayes \*/.  
/\* Documented in <http://www.guilford.com/p/hayes3> \*/.  
/\* PROCESS workshop schedule at <http://www.processmacro.org/workshops.html> \*/.  
\*/.

/\* THIS SOFTWARE IS PROVIDED "AS IS", WITHOUT WARRANTY OF ANY KIND \*/.  
/\* EXPRESS OR IMPLIED, INCLUDING BUT NOT LIMITED TO THE WARRANTIES OF \*/.  
/\* MERCHANTABILITY, FITNESS FOR A PARTICULAR PURPOSE AND NONINFRINGEMENT \*/.

/\* IN NO EVENT SHALL THE COPYRIGHT HOLDERS BE LIABLE FOR ANY CLAIM, \*/.  
/\* DAMAGES OR OTHER LIABILITY, WHETHER IN AN ACTION OF CONTRACT, TORT \*/.  
/\* OR OTHERWISE, ARISING FROM, OUT OF OR IN CONNECTION WITH THE \*/.  
/\* SOFTWARE OR THE USE OR OTHER DEALINGS IN THE SOFTWARE \*/.  
/\* USE OF THIS SOFTWARE IMPLIES AGREEMENT WITH THESE TERMS \*/.

set printback=off.

## Matrix

Run MATRIX procedure:

\*\*\*\*\* PROCESS Procedure for SPSS Version 3.5 \*\*\*\*\*

```
*****
Model   : 7
Y       : burnout
X       : Q22
M       : intquitF
W       : clientim
```

```
Sample
Size: 178
```

```
*****
OUTCOME VARIABLE:
intquitF
```

```
Model Summary

          R          R-sq          MSE          F          df1          df2
p
.2208    .0488    1.3142    2.9733    3.0000    174.0000    .03
32
```

```
Model

          coeff          se          t          p          LLCI          ULCI
constant  2.3796    .0860    27.6540    .0000    2.2098    2.5494
Q22        .3278    .1777    1.8450    .0667    -.0229    .6785
clientim   -.2362    .1170   -2.0185    .0451   -.4671   -.0052
Int_1      -.2779    .2470   -1.1248    .2622   -.7654    .2097
```

```
Product terms key:
Int_1   :      Q22      x      clientim
```

```
Test(s) of highest order unconditional interaction(s):
          R2-chng          F          df1          df2          p
X*W      .0069    1.2653    1.0000    174.0000    .2622
```

```
-----
Focal predict: Q22      (X)
Mod var: clientim (W)
```

Data for visualizing the conditional effect of the focal predictor:  
 Paste text below into a SPSS syntax window and execute to produce plot.

```
DATA LIST FREE/
  Q22      clientim      intquitF      .
BEGIN DATA.
  -.3764    -.7404    2.3536
  .6236    -.7404    2.8872
  -.3764    .0000    2.2562
  .6236    .0000    2.5840
  -.3764    .6292    2.1734
  .6236    .6292    2.3264
END DATA.
```

GRAPH/SCATTERPLOT=  
 clientim WITH intquitF BY Q22 .

\*\*\*\*\*  
 OUTCOME VARIABLE:  
 burnout

Model Summary

|   | R     | R-sq  | MSE   | F      | df1    | df2      |       |
|---|-------|-------|-------|--------|--------|----------|-------|
| P | .2696 | .0727 | .3822 | 6.8571 | 2.0000 | 175.0000 | .0014 |

Model

|          | coeff  | se    | t       | p     | LLCI   | ULCI   |
|----------|--------|-------|---------|-------|--------|--------|
| constant | 4.1260 | .1067 | 38.6613 | .0000 | 3.9154 | 4.3367 |
| Q22      | -.0932 | .0967 | -.9639  | .3364 | -.2840 | .0976  |
| intquitF | -.1369 | .0403 | -3.3953 | .0008 | -.2164 | -.0573 |

\*\*\*\*\* DIRECT AND INDIRECT EFFECTS OF X ON Y \*\*\*\*\*

Direct effect of X on Y

| Effect | se    | t      | p     | LLCI   | ULCI  |
|--------|-------|--------|-------|--------|-------|
| -.0932 | .0967 | -.9639 | .3364 | -.2840 | .0976 |

Conditional indirect effects of X on Y:

INDIRECT EFFECT:

Q22 -> intquitF -> burnout

| clientim | Effect | BootSE | BootLLCI | BootULCI |
|----------|--------|--------|----------|----------|
| -.7404   | -.0730 | .0422  | -.1684   | -.0031   |
| .0000    | -.0449 | .0275  | -.1060   | .0020    |
| .6292    | -.0209 | .0347  | -.0925   | .0493    |

Index of moderated mediation:

| clientim | Index | BootSE | BootLLCI | BootULCI |
|----------|-------|--------|----------|----------|
| ---      | .0380 | .0392  | -.0290   | .1271    |

\*\*\*\*\* ANALYSIS NOTES AND ERRORS \*\*\*\*\*

Level of confidence for all confidence intervals in output:

95.0000

Number of bootstrap samples for percentile bootstrap confidence intervals:

5000

W values in conditional tables are 1 SD below the mean, the mean, and the maximum.

NOTE: One SD above the mean is above the maximum observed in the data for W ,

so the maximum measurement for W is used for conditioning instead.

NOTE: The following variables were mean centered prior to analysis:  
clientim Q22

WARNING: Variables names longer than eight characters can produce incorrect output when some variables in the data file have the same first eight characters. Shorter variable names are recommended. By using this output, you are accepting all risk and consequences of interpreting or reporting results that may be incorrect .

----- END MATRIX -----

\* Encoding: UTF-8.

/\* PROCESS version 3.5 \*/.  
/\* Written by Andrew F. Hayes \*/.  
/\* www.afhayes.com\*/.  
/\* www.processmacro.org\*/.  
/\* Copyright 2017-2020 by Andrew F. Hayes \*/.  
/\* Documented in <http://www.guilford.com/p/hayes3> \*/.  
/\* PROCESS workshop schedule at <http://www.processmacro.org/workshops.html> \*/.  
\*/.

/\* THIS SOFTWARE IS PROVIDED "AS IS", WITHOUT WARRANTY OF ANY KIND \*/.  
/\* EXPRESS OR IMPLIED, INCLUDING BUT NOT LIMITED TO THE WARRANTIES OF \*/.  
/\* MERCHANTABILITY, FITNESS FOR A PARTICULAR PURPOSE AND NONINFRINGEMENT \*/.  
.  
/\* IN NO EVENT SHALL THE COPYRIGHT HOLDERS BE LIABLE FOR ANY CLAIM, \*/.  
/\* DAMAGES OR OTHER LIABILITY, WHETHER IN AN ACTION OF CONTRACT, TORT \*/.  
/\* OR OTHERWISE, ARISING FROM, OUT OF OR IN CONNECTION WITH THE \*/.  
/\* SOFTWARE OR THE USE OR OTHER DEALINGS IN THE SOFTWARE \*/.  
/\* USE OF THIS SOFTWARE IMPLIES AGREEMENT WITH THESE TERMS \*/.

set printback=off.

## Matrix

Run MATRIX procedure:

\*\*\*\*\* PROCESS Procedure for SPSS Version 3.5 \*\*\*\*\*

Written by Andrew F. Hayes, Ph.D.            [www.afhayes.com](http://www.afhayes.com)  
Documentation available in Hayes (2018). [www.guilford.com/p/hayes3](http://www.guilford.com/p/hayes3)

\*\*\*\*\*

Model    : 7  
      Y    : burnout  
      X    : Q22

M : jobsat  
W : clientim

Sample  
Size: 178

\*\*\*\*\*

OUTCOME VARIABLE:  
jobsat

Model Summary

|   | R     | R-sq  | MSE   | F      | df1    | df2      |       |
|---|-------|-------|-------|--------|--------|----------|-------|
| p | .3562 | .1269 | .3944 | 8.4274 | 3.0000 | 174.0000 | .0000 |

Model

|          | coeff  | se    | t       | p     | LLCI   | ULCI   |
|----------|--------|-------|---------|-------|--------|--------|
| constant | 3.9741 | .0471 | 84.3050 | .0000 | 3.8811 | 4.0672 |
| Q22      | -.2076 | .0973 | -2.1325 | .0344 | -.3997 | -.0155 |
| clientim | .2686  | .0641 | 4.1904  | .0000 | .1421  | .3951  |
| Int_1    | .2378  | .1353 | 1.7572  | .0806 | -.0293 | .5049  |

Product terms key:

Int\_1 : Q22 x clientim

Test(s) of highest order unconditional interaction(s):

|     | R2-chng | F      | df1    | df2      | p     |
|-----|---------|--------|--------|----------|-------|
| X*W | .0155   | 3.0879 | 1.0000 | 174.0000 | .0806 |

-----

Focal predict: Q22 (X)  
Mod var: clientim (W)

Conditional effects of the focal predictor at values of the moderator(s):

| clientim | Effect | se    | t       | p     | LLCI   | UL   |
|----------|--------|-------|---------|-------|--------|------|
| CI       |        |       |         |       |        |      |
| 24       | -.7404 | .1374 | -2.7916 | .0058 | -.6549 | -.11 |
| 55       | .0000  | .0973 | -2.1325 | .0344 | -.3997 | -.01 |
| 13       | .6292  | .1314 | -.4411  | .6597 | -.3172 | .20  |

Moderator value(s) defining Johnson-Neyman significance region(s):

| Value | % below | % above |
|-------|---------|---------|
| .0600 | 48.3146 | 51.6854 |

Conditional effect of focal predictor at values of the moderator:

| clientim | Effect  | se    | t       | p     | LLCI    | UL   |
|----------|---------|-------|---------|-------|---------|------|
| CI       |         |       |         |       |         |      |
| 46       | -3.3708 | .4634 | -2.1779 | .0308 | -1.9237 | -.09 |

|    |         |        |       |         |       |         |      |
|----|---------|--------|-------|---------|-------|---------|------|
| 92 | -3.1708 | -.9616 | .4369 | -2.2008 | .0291 | -1.8240 | -.09 |
| 37 | -2.9708 | -.9141 | .4106 | -2.2262 | .0273 | -1.7245 | -.10 |
| 79 | -2.7708 | -.8665 | .3844 | -2.2544 | .0254 | -1.6251 | -.10 |
| 19 | -2.5708 | -.8189 | .3582 | -2.2860 | .0235 | -1.5260 | -.11 |
| 56 | -2.3708 | -.7714 | .3323 | -2.3215 | .0214 | -1.4272 | -.11 |
| 89 | -2.1708 | -.7238 | .3065 | -2.3616 | .0193 | -1.3287 | -.11 |
| 17 | -1.9708 | -.6763 | .2810 | -2.4070 | .0171 | -1.2308 | -.12 |
| 39 | -1.7708 | -.6287 | .2557 | -2.4583 | .0149 | -1.1334 | -.12 |
| 53 | -1.5708 | -.5811 | .2309 | -2.5164 | .0128 | -1.0369 | -.12 |
| 56 | -1.3708 | -.5336 | .2067 | -2.5813 | .0107 | -.9415  | -.12 |
| 43 | -1.1708 | -.4860 | .1833 | -2.6519 | .0087 | -.8477  | -.12 |
| 07 | -.9708  | -.4384 | .1610 | -2.7237 | .0071 | -.7562  | -.12 |
| 38 | -.7708  | -.3909 | .1404 | -2.7847 | .0060 | -.6679  | -.11 |
| 19 | -.5708  | -.3433 | .1223 | -2.8071 | .0056 | -.5847  | -.10 |
| 25 | -.3708  | -.2958 | .1081 | -2.7368 | .0068 | -.5091  | -.08 |
| 22 | -.1708  | -.2482 | .0993 | -2.4989 | .0134 | -.4442  | -.05 |
| 81 | .0292   | -.2006 | .0975 | -2.0568 | .0412 | -.3932  | -.00 |
| 00 | .0600   | -.1933 | .0979 | -1.9737 | .0500 | -.3866  | .00  |
| 04 | .2292   | -.1531 | .1031 | -1.4846 | .1395 | -.3566  | .05  |
| 14 | .4292   | -.1055 | .1149 | -.9179  | .3599 | -.3324  | .12  |
| 13 | .6292   | -.0580 | .1314 | -.4411  | .6597 | -.3172  | .20  |

Data for visualizing the conditional effect of the focal predictor:  
 Paste text below into a SPSS syntax window and execute to produce plot.

```
DATA LIST FREE/
  Q22      clientim  jobsat  .
BEGIN DATA.
  -.3764   -.7404    3.9197
  .6236    -.7404    3.5360
  -.3764    .0000    4.0523
  .6236    .0000    3.8447
```

-.3764 .6292 4.1649  
 .6236 .6292 4.1070

END DATA.

GRAPH/SCATTERPLOT=

clientim WITH jobsat BY Q22 .

\*\*\*\*\*

OUTCOME VARIABLE:

burnout

Model Summary

|   | R     | R-sq  | MSE   | F       | df1    | df2      |       |
|---|-------|-------|-------|---------|--------|----------|-------|
| p | .4857 | .2359 | .3150 | 27.0093 | 2.0000 | 175.0000 | .0000 |

Model

|          | coeff  | se    | t      | p     | LLCI   | ULCI   |
|----------|--------|-------|--------|-------|--------|--------|
| constant | 1.9719 | .2585 | 7.6290 | .0000 | 1.4618 | 2.4820 |
| Q22      | -.0338 | .0881 | -.3833 | .7020 | -.2077 | .1401  |
| jobsat   | .4604  | .0642 | 7.1670 | .0000 | .3336  | .5872  |

\*\*\*\*\* DIRECT AND INDIRECT EFFECTS OF X ON Y \*\*\*\*\*

Direct effect of X on Y

| Effect | se    | t      | p     | LLCI   | ULCI  |
|--------|-------|--------|-------|--------|-------|
| -.0338 | .0881 | -.3833 | .7020 | -.2077 | .1401 |

Conditional indirect effects of X on Y:

INDIRECT EFFECT:

Q22 -> jobsat -> burnout

| clientim | Effect | BootSE | BootLLCI | BootULCI |
|----------|--------|--------|----------|----------|
| -.7404   | -.1766 | .0817  | -.3423   | -.0229   |
| .0000    | -.0956 | .0511  | -.2082   | -.0098   |
| .6292    | -.0267 | .0562  | -.1484   | .0691    |

Index of moderated mediation:

| clientim | Index | BootSE | BootLLCI | BootULCI |
|----------|-------|--------|----------|----------|
|          | .1095 | .0681  | -.0410   | .2337    |

---

\*\*\*\*\* ANALYSIS NOTES AND ERRORS \*\*\*\*\*

Level of confidence for all confidence intervals in output:

95.0000

Number of bootstrap samples for percentile bootstrap confidence intervals:

5000

W values in conditional tables are 1 SD below the mean, the mean, and the maximum.

NOTE: One SD above the mean is above the maximum observed in the data for W  
,  
so the maximum measurement for W is used for conditioning instead.

NOTE: The following variables were mean centered prior to analysis:  
clientim Q22

WARNING: Variables names longer than eight characters can produce incorrect  
output  
when some variables in the data file have the same first eight characters.  
Shorter  
variable names are recommended. By using this output, you are accepting all  
risk  
and consequences of interpreting or reporting results that may be incorrect  
.

----- END MATRIX -----

\* Encoding: UTF-8.

/\* PROCESS version 3.5 \*/.  
/\* Written by Andrew F. Hayes \*/.  
/\* www.afhayes.com\*/.  
/\* www.processmacro.org\*/.  
/\* Copyright 2017-2020 by Andrew F. Hayes \*/.  
/\* Documented in <http://www.guilford.com/p/hayes3> \*/.  
/\* PROCESS workshop schedule at <http://www.processmacro.org/workshops.html>  
\*/.

/\* THIS SOFTWARE IS PROVIDED "AS IS", WITHOUT WARRANTY OF ANY KIND \*/.  
/\* EXPRESS OR IMPLIED, INCLUDING BUT NOT LIMITED TO THE WARRANTIES OF \*/.  
/\* MERCHANTABILITY, FITNESS FOR A PARTICULAR PURPOSE AND NONINFRINGEMENT \*/.  
.  
/\* IN NO EVENT SHALL THE COPYRIGHT HOLDERS BE LIABLE FOR ANY CLAIM, \*/.  
/\* DAMAGES OR OTHER LIABILITY, WHETHER IN AN ACTION OF CONTRACT, TORT \*/.  
/\* OR OTHERWISE, ARISING FROM, OUT OF OR IN CONNECTION WITH THE \*/.  
/\* SOFTWARE OR THE USE OR OTHER DEALINGS IN THE SOFTWARE \*/.  
/\* USE OF THIS SOFTWARE IMPLIES AGREEMENT WITH THESE TERMS \*/.

set printback=off.

## Matrix

Run MATRIX procedure:

\*\*\*\*\* PROCESS Procedure for SPSS Version 3.5 \*\*\*\*\*

Written by Andrew F. Hayes, Ph.D.            [www.afhayes.com](http://www.afhayes.com)  
Documentation available in Hayes (2018). [www.guilford.com/p/hayes3](http://www.guilford.com/p/hayes3)

\*\*\*\*\*

Model : 7  
Y : burnout  
X : Q22  
M : wellbein  
W : clientim

Sample  
Size: 178

\*\*\*\*\*  
OUTCOME VARIABLE:  
wellbein

Model Summary

|   | R     | R-sq  | MSE   | F      | df1    | df2      |       |
|---|-------|-------|-------|--------|--------|----------|-------|
| p | .3229 | .1043 | .7529 | 6.7524 | 3.0000 | 174.0000 | .0002 |

Model

|          | coeff  | se    | t       | p     | LLCI   | ULCI   |
|----------|--------|-------|---------|-------|--------|--------|
| constant | 4.2602 | .0651 | 65.4106 | .0000 | 4.1317 | 4.3888 |
| Q22      | -.3650 | .1345 | -2.7138 | .0073 | -.6304 | -.0995 |
| clientim | .3031  | .0886 | 3.4224  | .0008 | .1283  | .4779  |
| Int_1    | -.0153 | .1870 | -.0819  | .9348 | -.3843 | .3537  |

Product terms key:  
Int\_1 : Q22 x clientim

Test(s) of highest order unconditional interaction(s):

|     | R2-chng | F     | df1    | df2      | p     |
|-----|---------|-------|--------|----------|-------|
| X*W | .0000   | .0067 | 1.0000 | 174.0000 | .9348 |

-----  
Focal predict: Q22 (X)  
Mod var: clientim (W)

Data for visualizing the conditional effect of the focal predictor:  
Paste text below into a SPSS syntax window and execute to produce plot.

DATA LIST FREE/  
Q22 clientim wellbein .  
BEGIN DATA.  
-.3764 -.7404 4.1689  
.6236 -.7404 3.8153  
-.3764 .0000 4.3976  
.6236 .0000 4.0326  
-.3764 .6292 4.5919  
.6236 .6292 4.2173  
END DATA.  
GRAPH/SCATTERPLOT=  
clientim WITH wellbein BY Q22 .

\*\*\*\*\*

OUTCOME VARIABLE:

burnout

Model Summary

|   | R     | R-sq  | MSE   | F       | df1    | df2      |       |
|---|-------|-------|-------|---------|--------|----------|-------|
| p | .4039 | .1631 | .3449 | 17.0581 | 2.0000 | 175.0000 | .0000 |

Model

|          | coeff  | se    | t       | p     | LLCI   | ULCI   |
|----------|--------|-------|---------|-------|--------|--------|
| constant | 2.6088 | .2161 | 12.0742 | .0000 | 2.1823 | 3.0352 |
| Q22      | -.0327 | .0929 | -.3520  | .7252 | -.2160 | .1506  |
| wellbein | .2795  | .0496 | 5.6297  | .0000 | .1815  | .3775  |

\*\*\*\*\* DIRECT AND INDIRECT EFFECTS OF X ON Y \*\*\*\*\*

Direct effect of X on Y

| Effect | se    | t      | p     | LLCI   | ULCI  |
|--------|-------|--------|-------|--------|-------|
| -.0327 | .0929 | -.3520 | .7252 | -.2160 | .1506 |

Conditional indirect effects of X on Y:

INDIRECT EFFECT:

Q22 -> wellbein -> burnout

| clientim | Effect | BootSE | BootLLCI | BootULCI |
|----------|--------|--------|----------|----------|
| -.7404   | -.0988 | .0566  | -.2214   | .0014    |
| .0000    | -.1020 | .0421  | -.1931   | -.0282   |
| .6292    | -.1047 | .0544  | -.2174   | -.0018   |

Index of moderated mediation:

|          | Index  | BootSE | BootLLCI | BootULCI |
|----------|--------|--------|----------|----------|
| clientim | -.0043 | .0528  | -.1021   | .1092    |
| ---      |        |        |          |          |

\*\*\*\*\* ANALYSIS NOTES AND ERRORS \*\*\*\*\*

Level of confidence for all confidence intervals in output:

95.0000

Number of bootstrap samples for percentile bootstrap confidence intervals:

5000

W values in conditional tables are 1 SD below the mean, the mean, and the maximum.

NOTE: One SD above the mean is above the maximum observed in the data for W

, so the maximum measurement for W is used for conditioning instead.

NOTE: The following variables were mean centered prior to analysis:

clientim Q22

WARNING: Variables names longer than eight characters can produce incorrect output when some variables in the data file have the same first eight characters. Shorter variable names are recommended. By using this output, you are accepting all risk and consequences of interpreting or reporting results that may be incorrect .

----- END MATRIX -----

\* Encoding: UTF-8.

/\* PROCESS version 3.5 \*/.  
/\* Written by Andrew F. Hayes \*/.  
/\* www.afhayes.com\*/.  
/\* www.processmacro.org\*/.  
/\* Copyright 2017-2020 by Andrew F. Hayes \*/.  
/\* Documented in <http://www.guilford.com/p/hayes3> \*/.  
/\* PROCESS workshop schedule at <http://www.processmacro.org/workshops.html> \*/.  
\*/.

/\* THIS SOFTWARE IS PROVIDED "AS IS", WITHOUT WARRANTY OF ANY KIND \*/.  
/\* EXPRESS OR IMPLIED, INCLUDING BUT NOT LIMITED TO THE WARRANTIES OF \*/.  
/\* MERCHANTABILITY FITNESS FOR A PARTICULAR PURPOSE AND NONINFRINGEMENT \*/.  
.  
/\* IN NO EVENT SHALL THE COPYRIGHT HOLDERS BE LIABLE FOR ANY CLAIM, \*/.  
/\* DAMAGES OR OTHER LIABILITY, WHETHER IN AN ACTION OF CONTRACT, TORT \*/.  
/\* OR OTHERWISE, ARISING FROM, OUT OF OR IN CONNECTION WITH THE \*/.  
/\* SOFTWARE OR THE USE OR OTHER DEALINGS IN THE SOFTWARE \*/.  
/\* USE OF THIS SOFTWARE IMPLIES AGREEMENT WITH THESE TERMS \*/.

set printback=off.

## Matrix

Run MATRIX procedure:

\*\*\*\*\* PROCESS Procedure for SPSS Version 3.5 \*\*\*\*\*

Written by Andrew F. Hayes, Ph.D.            [www.afhayes.com](http://www.afhayes.com)  
Documentation available in Hayes (2018). [www.guilford.com/p/hayes3](http://www.guilford.com/p/hayes3)

\*\*\*\*\*

Model    : 7  
      Y    : burnout  
      X    : Q22  
      M    : engaged  
      W    : clientim

Sample

Size: 178

\*\*\*\*\*

OUTCOME VARIABLE:

engaged

Model Summary

|   | R     | R-sq  | MSE   | F       | df1    | df2      |       |
|---|-------|-------|-------|---------|--------|----------|-------|
| p | .5501 | .3026 | .2551 | 25.1649 | 3.0000 | 174.0000 | .0000 |

Model

|          | coeff  | se    | t        | p     | LLCI   | ULCI   |
|----------|--------|-------|----------|-------|--------|--------|
| constant | 4.1348 | .0379 | 109.0666 | .0000 | 4.0599 | 4.2096 |
| Q22      | -.1874 | .0783 | -2.3933  | .0178 | -.3419 | -.0328 |
| clientim | .3995  | .0515 | 7.7509   | .0000 | .2978  | .5013  |
| Int_1    | .3621  | .1088 | 3.3267   | .0011 | .1473  | .5769  |

Product terms key:

Int\_1 : Q22 x clientim

Test(s) of highest order unconditional interaction(s):

|     | R2-chng | F       | df1    | df2      | p     |
|-----|---------|---------|--------|----------|-------|
| X*W | .0444   | 11.0672 | 1.0000 | 174.0000 | .0011 |

-----

Focal predict: Q22 (X)  
Mod var: clientim (W)

Conditional effects of the focal predictor at values of the moderator(s):

| clientim | Effect | se    | t       | p     | LLCI   | UL   |
|----------|--------|-------|---------|-------|--------|------|
| CI       |        |       |         |       |        |      |
| 73       | -.7404 | .1105 | -4.1206 | .0001 | -.6736 | -.23 |
| 28       | .0000  | .0783 | -2.3933 | .0178 | -.3419 | -.03 |
| 90       | .6292  | .1057 | .3830   | .7022 | -.1681 | .24  |

Moderator value(s) defining Johnson-Neyman significance region(s):

| Value | % below | % above |
|-------|---------|---------|
| .0860 | 48.3146 | 51.6854 |

Conditional effect of focal predictor at values of the moderator:

| clientim | Effect  | se    | t       | p     | LLCI    | UL   |
|----------|---------|-------|---------|-------|---------|------|
| CI       |         |       |         |       |         |      |
| 23       | -3.3708 | .3726 | -3.7778 | .0002 | -2.1433 | -.67 |
| 18       | -3.1708 | .3514 | -3.8002 | .0002 | -2.0289 | -.64 |
| 12       | -2.9708 | .3302 | -3.8248 | .0002 | -1.9147 | -.61 |

|    |         |         |       |         |       |         |      |
|----|---------|---------|-------|---------|-------|---------|------|
| 05 | -2.7708 | -1.1906 | .3091 | -3.8516 | .0002 | -1.8006 | -.58 |
| 95 | -2.5708 | -1.1181 | .2881 | -3.8811 | .0001 | -1.6868 | -.54 |
| 83 | -2.3708 | -1.0457 | .2672 | -3.9134 | .0001 | -1.5731 | -.51 |
| 68 | -2.1708 | -.9733  | .2465 | -3.9488 | .0001 | -1.4598 | -.48 |
| 49 | -1.9708 | -.9009  | .2260 | -3.9872 | .0001 | -1.3469 | -.45 |
| 26 | -1.7708 | -.8285  | .2057 | -4.0283 | .0001 | -1.2344 | -.42 |
| 95 | -1.5708 | -.7561  | .1857 | -4.0710 | .0001 | -1.1226 | -.38 |
| 56 | -1.3708 | -.6837  | .1662 | -4.1126 | .0001 | -1.0118 | -.35 |
| 04 | -1.1708 | -.6113  | .1474 | -4.1473 | .0001 | -.9022  | -.32 |
| 33 | -.9708  | -.5388  | .1295 | -4.1623 | .0000 | -.7944  | -.28 |
| 36 | -.7708  | -.4664  | .1129 | -4.1319 | .0001 | -.6892  | -.24 |
| 99 | -.5708  | -.3940  | .0984 | -4.0059 | .0001 | -.5881  | -.19 |
| 01 | -.3708  | -.3216  | .0869 | -3.7004 | .0003 | -.4931  | -.15 |
| 15 | -.1708  | -.2492  | .0799 | -3.1197 | .0021 | -.4068  | -.09 |
| 19 | .0292   | -.1768  | .0785 | -2.2534 | .0255 | -.3316  | -.02 |
| 00 | .0860   | -.1562  | .0791 | -1.9737 | .0500 | -.3124  | .00  |
| 93 | .2292   | -.1044  | .0829 | -1.2586 | .2099 | -.2680  | .05  |
| 05 | .4292   | -.0320  | .0924 | -.3456  | .7300 | -.2144  | .15  |
| 90 | .6292   | .0405   | .1057 | .3830   | .7022 | -.1681  | .24  |

Data for visualizing the conditional effect of the focal predictor:  
 Paste text below into a SPSS syntax window and execute to produce plot.

```

DATA LIST FREE/
  Q22      clientim  engaged  .
BEGIN DATA.
  -.3764   -.7404    4.0104
  .6236    -.7404    3.5549
  -.3764    .0000    4.2053
  .6236    .0000    4.0179
  -.3764    .6292    4.3709
  .6236    .6292    4.4114
END DATA.
GRAPH/SCATTERPLOT=

```

clientim WITH engaged BY Q22 .

\*\*\*\*\*

OUTCOME VARIABLE:

burnout

Model Summary

|   | R     | R-sq  | MSE   | F       | df1    | df2      |       |
|---|-------|-------|-------|---------|--------|----------|-------|
| p | .4053 | .1642 | .3445 | 17.1948 | 2.0000 | 175.0000 | .0000 |

Model

|          | coeff  | se    | t      | p     | LLCI   | ULCI   |
|----------|--------|-------|--------|-------|--------|--------|
| constant | 2.0529 | .3121 | 6.5784 | .0000 | 1.4370 | 2.6688 |
| Q22      | -.0456 | .0924 | -.4934 | .6223 | -.2279 | .1367  |
| engaged  | .4231  | .0748 | 5.6537 | .0000 | .2754  | .5709  |

\*\*\*\*\* DIRECT AND INDIRECT EFFECTS OF X ON Y \*\*\*\*\*

Direct effect of X on Y

| Effect | se    | t      | p     | LLCI   | ULCI  |
|--------|-------|--------|-------|--------|-------|
| -.0456 | .0924 | -.4934 | .6223 | -.2279 | .1367 |

Conditional indirect effects of X on Y:

INDIRECT EFFECT:

Q22 -> engaged -> burnout

| clientim | Effect | BootSE | BootLLCI | BootULCI |
|----------|--------|--------|----------|----------|
| -.7404   | -.1927 | .0784  | -.3589   | -.0499   |
| .0000    | -.0793 | .0392  | -.1676   | -.0142   |
| .6292    | .0171  | .0435  | -.0756   | .0976    |

Index of moderated mediation:

|          | Index | BootSE | BootLLCI | BootULCI |
|----------|-------|--------|----------|----------|
| clientim | .1532 | .0704  | .0166    | .2955    |

---

\*\*\*\*\* ANALYSIS NOTES AND ERRORS \*\*\*\*\*

Level of confidence for all confidence intervals in output:

95.0000

Number of bootstrap samples for percentile bootstrap confidence intervals:

5000

W values in conditional tables are 1 SD below the mean, the mean, and the maximum.

NOTE: One SD above the mean is above the maximum observed in the data for W

,

so the maximum measurement for W is used for conditioning instead.

NOTE: The following variables were mean centered prior to analysis:  
clientim Q22

WARNING: Variables names longer than eight characters can produce incorrect output when some variables in the data file have the same first eight characters. Shorter variable names are recommended. By using this output, you are accepting all risk and consequences of interpreting or reporting results that may be incorrect .

----- END MATRIX -----

\* Encoding: UTF-8.

/\* PROCESS version 3.5 \*/.  
/\* Written by Andrew F. Hayes \*/.  
/\* www.afhayes.com\*/.  
/\* www.processmacro.org\*/.  
/\* Copyright 2017-2020 by Andrew F. Hayes \*/.  
/\* Documented in <http://www.guilford.com/p/hayes3> \*/.  
/\* PROCESS workshop schedule at <http://www.processmacro.org/workshops.html> \*/.  
\*/.

/\* THIS SOFTWARE IS PROVIDED "AS IS", WITHOUT WARRANTY OF ANY KIND \*/.  
/\* EXPRESS OR IMPLIED, INCLUDING BUT NOT LIMITED TO THE WARRANTIES OF \*/.  
/\* MERCHANTABILITY FITNESS FOR A PARTICULAR PURPOSE AND NONINFRINGEMENT \*/.

/\* IN NO EVENT SHALL THE COPYRIGHT HOLDERS BE LIABLE FOR ANY CLAIM, \*/.  
/\* DAMAGES OR OTHER LIABILITY, WHETHER IN AN ACTION OF CONTRACT, TORT \*/.  
/\* OR OTHERWISE, ARISING FROM, OUT OF OR IN CONNECTION WITH THE \*/.  
/\* SOFTWARE OR THE USE OR OTHER DEALINGS IN THE SOFTWARE \*/.  
/\* USE OF THIS SOFTWARE IMPLIES AGREEMENT WITH THESE TERMS \*/.

set printback=off.
